# Supplementary material for: Design of the New Closo-Dodecarborate-Containing Gemcitabine Analogue for the Albumin-Based Theranostics Composition
Source: MDPI journal article supplement (doi:10.3390/molecules28062672), 2023-03-15
Supplement: s1 [file s1]

## Supporting Information for

# Design of the new closo-dodecarborate-containing gemcitabine analogue for the albumin-based theranostics composition.

Valeria I. Raskolupova <sup>1</sup>, Meiling Wang <sup>2</sup>, Maya A. Dymova <sup>1</sup>, Gleb O. Petrov <sup>1</sup>, Ivan M. Shchudlo <sup>3</sup>, Sergey Yu. Taskaev <sup>2,3</sup>, Tatyana V. Abramova <sup>1</sup>, Tatyana S. Godovikova <sup>1,2</sup>, Vladimir N. Silnikov <sup>1</sup>, Tatyana V. Popova <sup>1,2\*</sup>.

<sup>1</sup> Institute of Chemical Biology and Fundamental Medicine, SB RAS, 630090 Novosibirsk, Russia; v.raskolupova@mail.ru (V.I.R.); maya.a.rot@gmail.com (M.A.D.); [petrov.olegovich@gmail.com](mailto:petrov.olegovich@gmail.com) (G.O.P.) t\_godovikova@mail.ru (T.S.G); abramova@niboch.nsc.ru (T.V.A.); silnik@niboch.nsc.ru (V.N.S.); io197724@gmail.com (T.V.P.)

<sup>2</sup> Novosibirsk State University, Faculty of Natural Sciences, 630090 Novosibirsk, Russia; io197724@gmail.com (T.V.P.); 153890812@qq.com (M.V.); s.yu.taskaev@inp.nsk.su (S.Yu.T.)

<sup>3</sup> Budker Institute of Nuclear Physics, SB RAS, 630090 Novosibirsk, Russia; s.yu.taskaev@inp.nsk.su (S.Yu.T.); [cshudlo.i.m@gmail.com](mailto:cshudlo.i.m@gmail.com) (I.M.S.)

\* Correspondence: io197724@gmail.ru; Tel.: +8-383-3635183

## Spectral data for new compounds

4-*N*-benzoyl-2'-deoxy-2',2'-difluorocytidine (2)

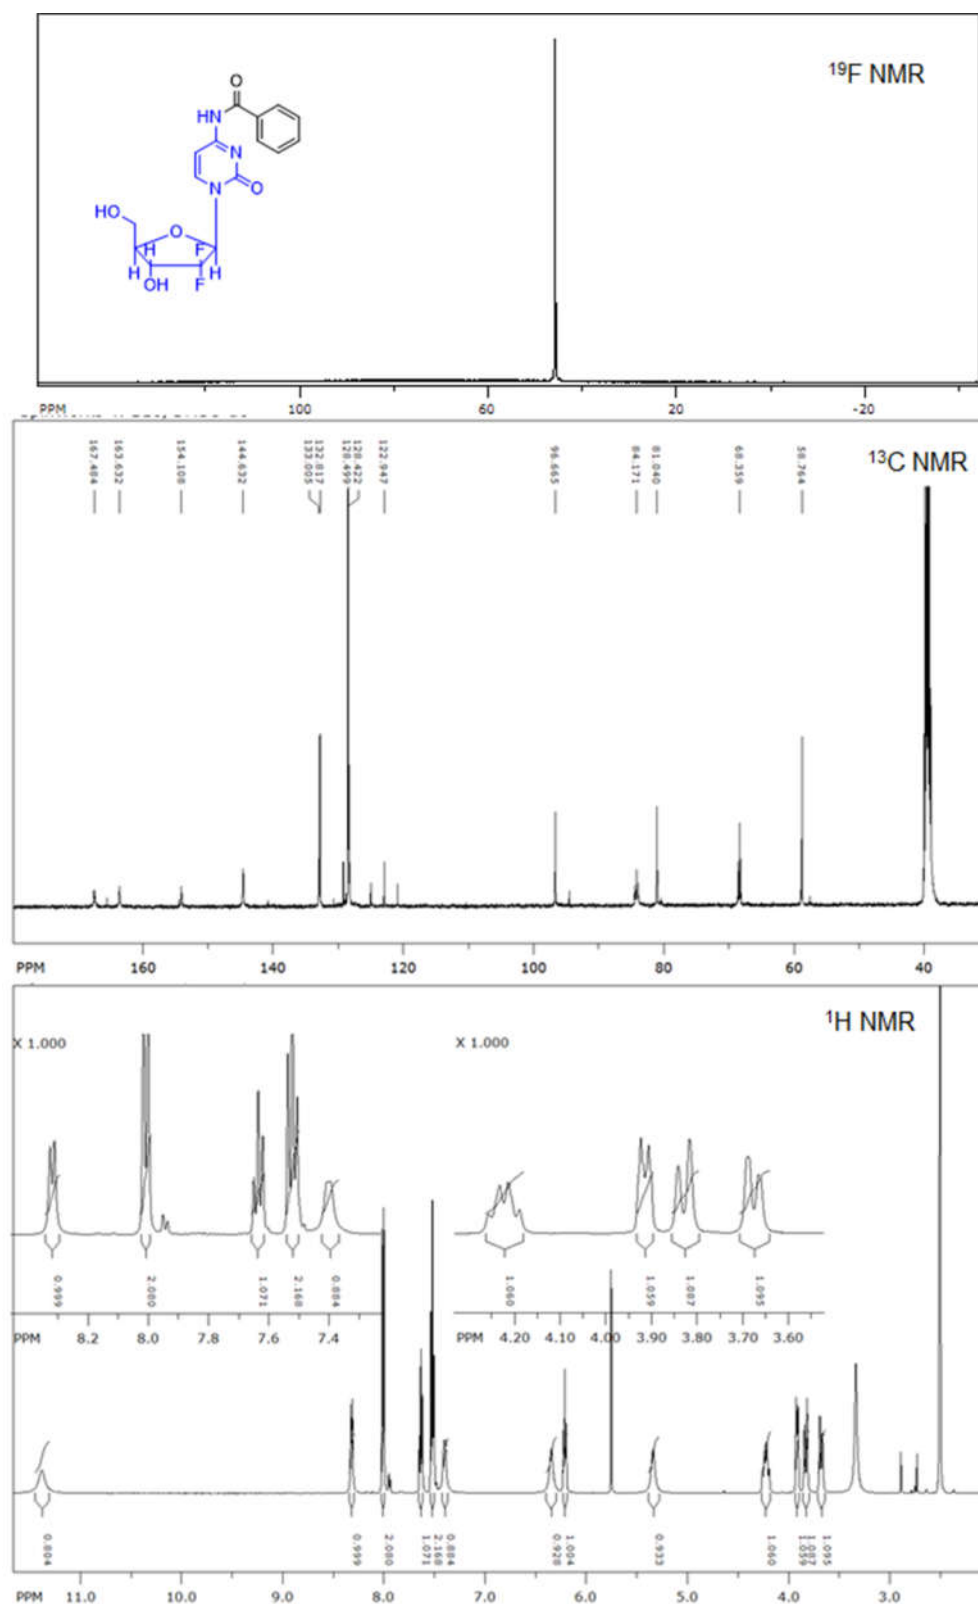

Figure S1. Characteristics of the 4-*N*-benzoyl-2'-deoxy-2',2'-difluorocytidine.

4-*N*-(2-dimethylaminoethyl)-2'-deoxy-2',2'-difluorocytidine (3)

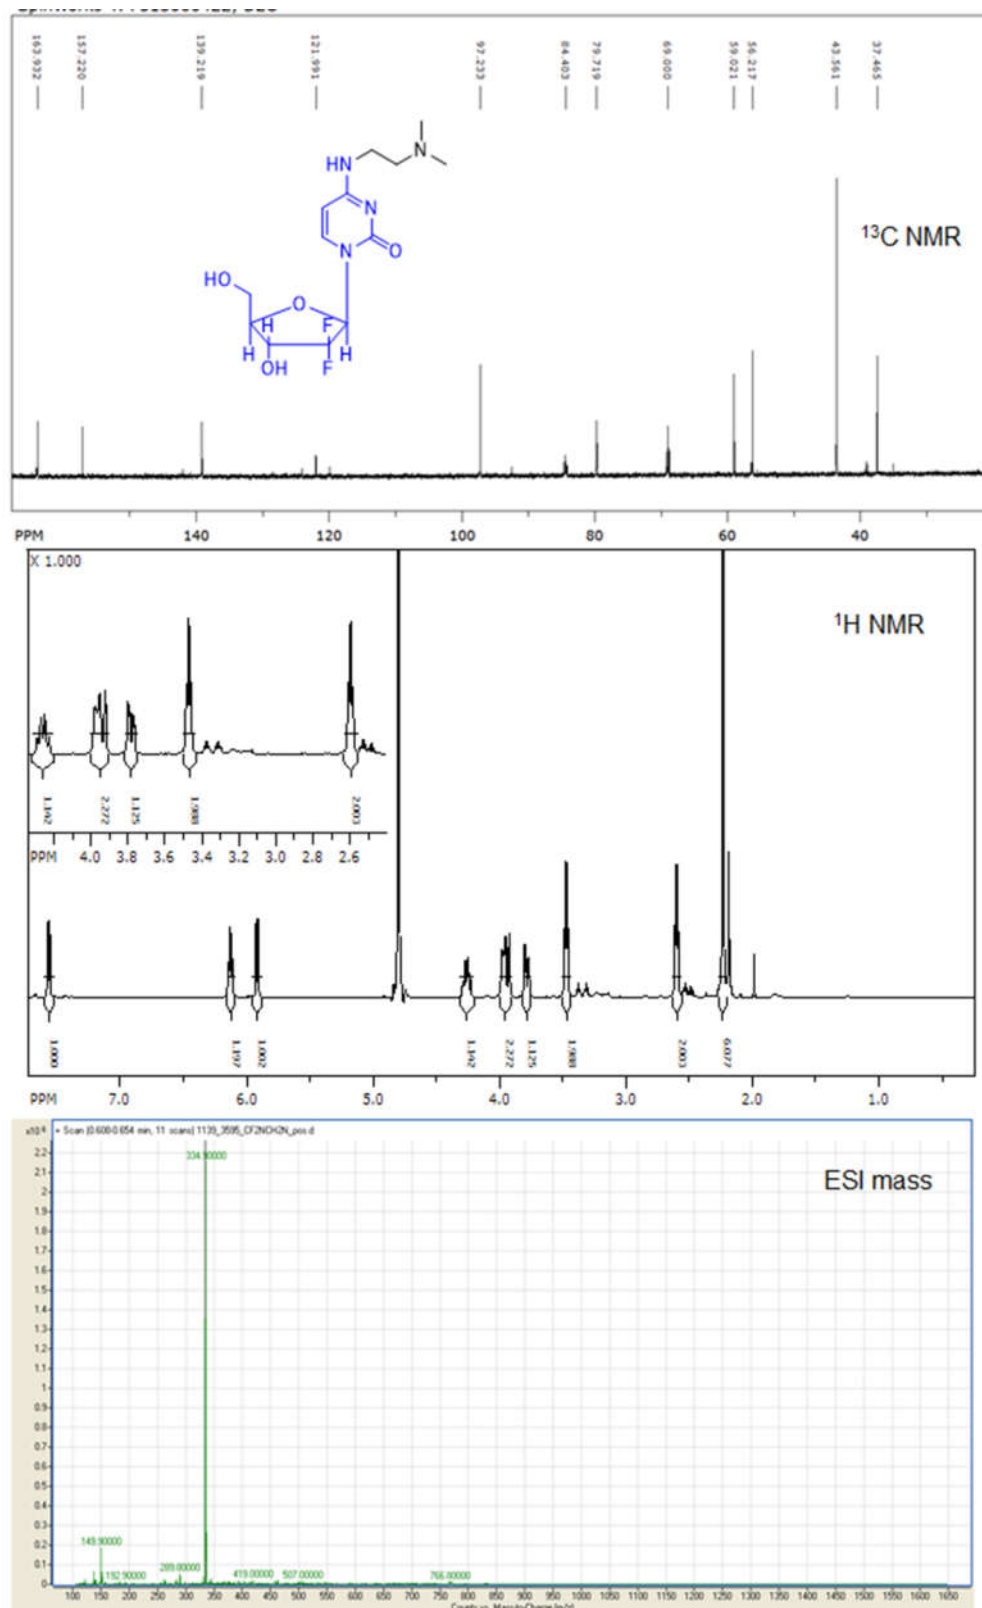

Figure S2. Characteristics of the 4-*N*-(2-dimethylaminoethyl)-2'-deoxy-2',2'-difluorocytidine

$H^+[Conjugate\ 5]$

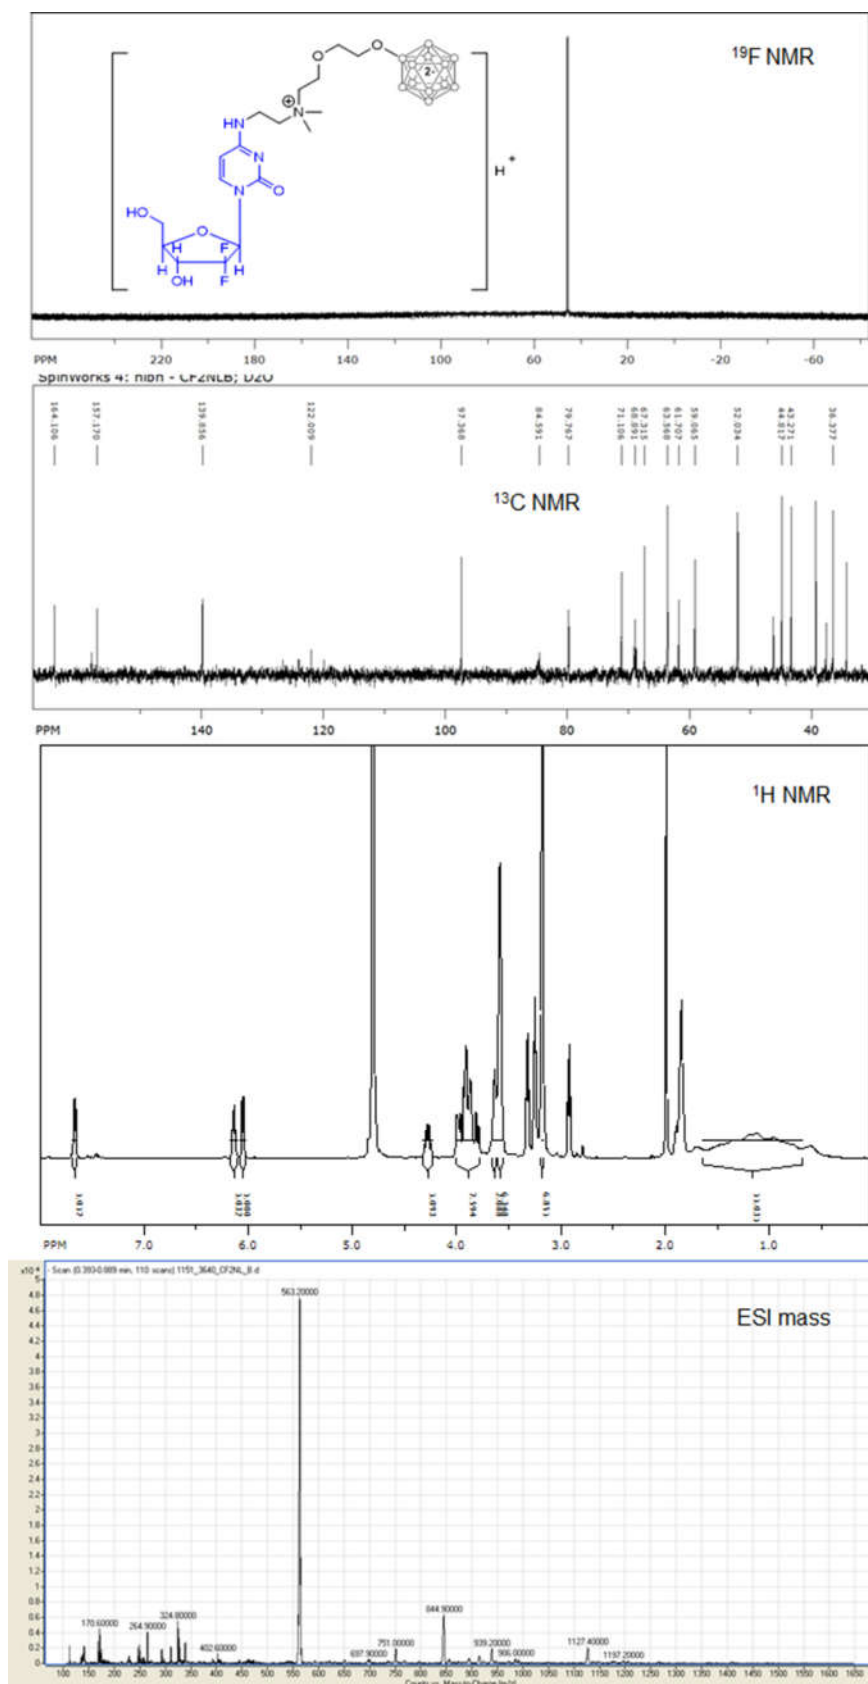

Figure S3. Characteristics of the  $H^+[Compound\ 5]$ .

**Chemical Structure of Compound 1:** A pyrimidine ring substituted with a 2-deoxy-2-(phosphonomethyl)ribose moiety at the 4-position and a 2-(dimethylamino)ethoxy group at the 5-position. The pyrimidine ring is also substituted with a 2-(dimethylamino)ethoxy group at the 2-position.

**<sup>13</sup>C NMR Spectrum:** Shows peaks at 166.0, 164.0, 157.0, 156.0, 139.6, 132.1, 97.3, 86.4, 78.5, 62.0, 58.2, 51.9, 46.3, 34.2, 27.9, and 16.9 ppm.

**<sup>1</sup>H NMR Spectrum:** Shows peaks at 7.0, 6.0, 5.0, 4.0, 3.0, 2.0, 1.0, and 0.0 ppm. Integration values are provided for several peaks: 1.000, 1.025, 1.004, 1.075, 1.037, 3.270, 2.156, 2.112, 6.045, 2.112, 1.037, 3.270, 2.112, 5.918, 6.074, and 1.000.

**<sup>31</sup>P NMR Spectrum:** Shows a single peak at 0 ppm.

**<sup>19</sup>F NMR Spectrum:** Shows a single peak at 0 ppm.

**ESI mass Spectrum:** Shows peaks at 160.0, 212.0, 412.0, 563.0, 643.0, 698.0, 878.0, 924.0, 1016.0, 1132.0, and 1432.0 m/z.

Figure S4. Characteristics of the [Compound 6](TEA)<sub>3</sub>.

[illegible]

6

**<sup>13</sup>C NMR**

Chemical structure of compound 10 is shown above the spectra.

**<sup>1</sup>H NMR**

**<sup>19</sup>F NMR**

**<sup>31</sup>P NMR**

**ESI mass**

7

# Compound 9

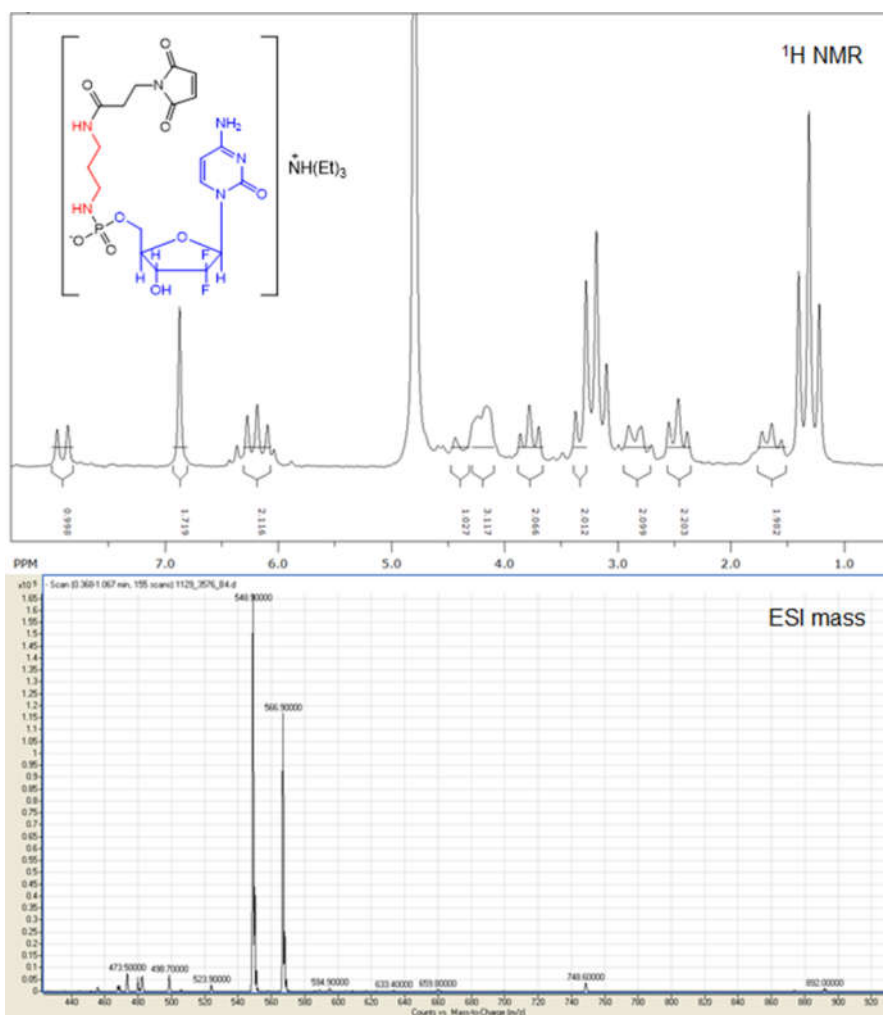

Figure S7. Characteristics of the [Compound 9](TEA).

$^1\text{H}$  NMR ( $\text{D}_2\text{O}$ ): 7.91 (1H, d,  $J$  7.6, H6), 6.88 (2H, s, CH=CH), 6.31-6.07 (2H, m, H1', H5), 4.47-4.31 (1H, m, H3'), 4.30-4.09 (3H, m, H4', H5'), 3.78 (2H, t,  $J$  6.5, CH<sub>2</sub>N), 3.39-3.28 (2H, m, CH<sub>2</sub>NHCO), 2.95-2.71 (2H, m, CH<sub>2</sub>CO), 2.46 (2H, t,  $J$  6.5, CH<sub>2</sub>NHP), 1.64 (2H, t,  $J$  6.8, CH<sub>2</sub>).  $[\text{M}-\text{H}]^-$  calcd. for  $\text{C}_{19}\text{H}_{24}\text{F}_2\text{N}_6\text{O}_9\text{P}^-$  549.13; found 548.90.



**$^1\text{H}$  NMR**

Chemical structure of the compound is shown, including the  $\text{NH}(\text{Et})_3^+$  counterion. The structure features a nucleoside core with a phosphate group, an amine, and a carboxylic acid moiety.

The  $^1\text{H}$  NMR spectrum (ppm) shows peaks corresponding to the structure, with integration values provided below the baseline:

- 8.000
- 6.666
- 4.998
- 3.998
- 3.000
- 1.998
- 2.000
- 1.998
- 1.998

**ESI mass**

Scan (0.701-1.798 sec, 225 scans) 1217\_2015\_04\_neg.d

The ESI mass spectrum shows peaks corresponding to the compound, with labeled m/z values:

- 524.0000
- 555.7000
- 566.0000
- 570.0000
- 590.0000
- 602.0000
- 662.0000
- 670.0000
- 702.0000

<sup>1</sup>H NMR (D<sub>2</sub>O): 7.92 (1H, d, *J* 7.6, H6), 6.46-5.98 (4H, m, CH=CH, H5, H1'), 4.52-4.34 (1H, m, H3'), 4.30-4.10 (3H, m, H4', H5'), 3.48 (2H, t, *J* 6.7, CH<sub>2</sub>NH), 3.38-3.25 (2H, m, CH<sub>2</sub>NHCO), 2.96-2.71 (2H, m, CH<sub>2</sub>CO), 2.45 (2H, t, *J* 6.7, CH<sub>2</sub>NHP), 1.68 (2H, t, *J* 6.8, CH<sub>2</sub>). [M-H]<sup>-</sup> calcd. for C<sub>19</sub>H<sub>26</sub>F<sub>2</sub>N<sub>6</sub>O<sub>10</sub>P<sup>-</sup> 567.14; found 566.90.

# Compound 10

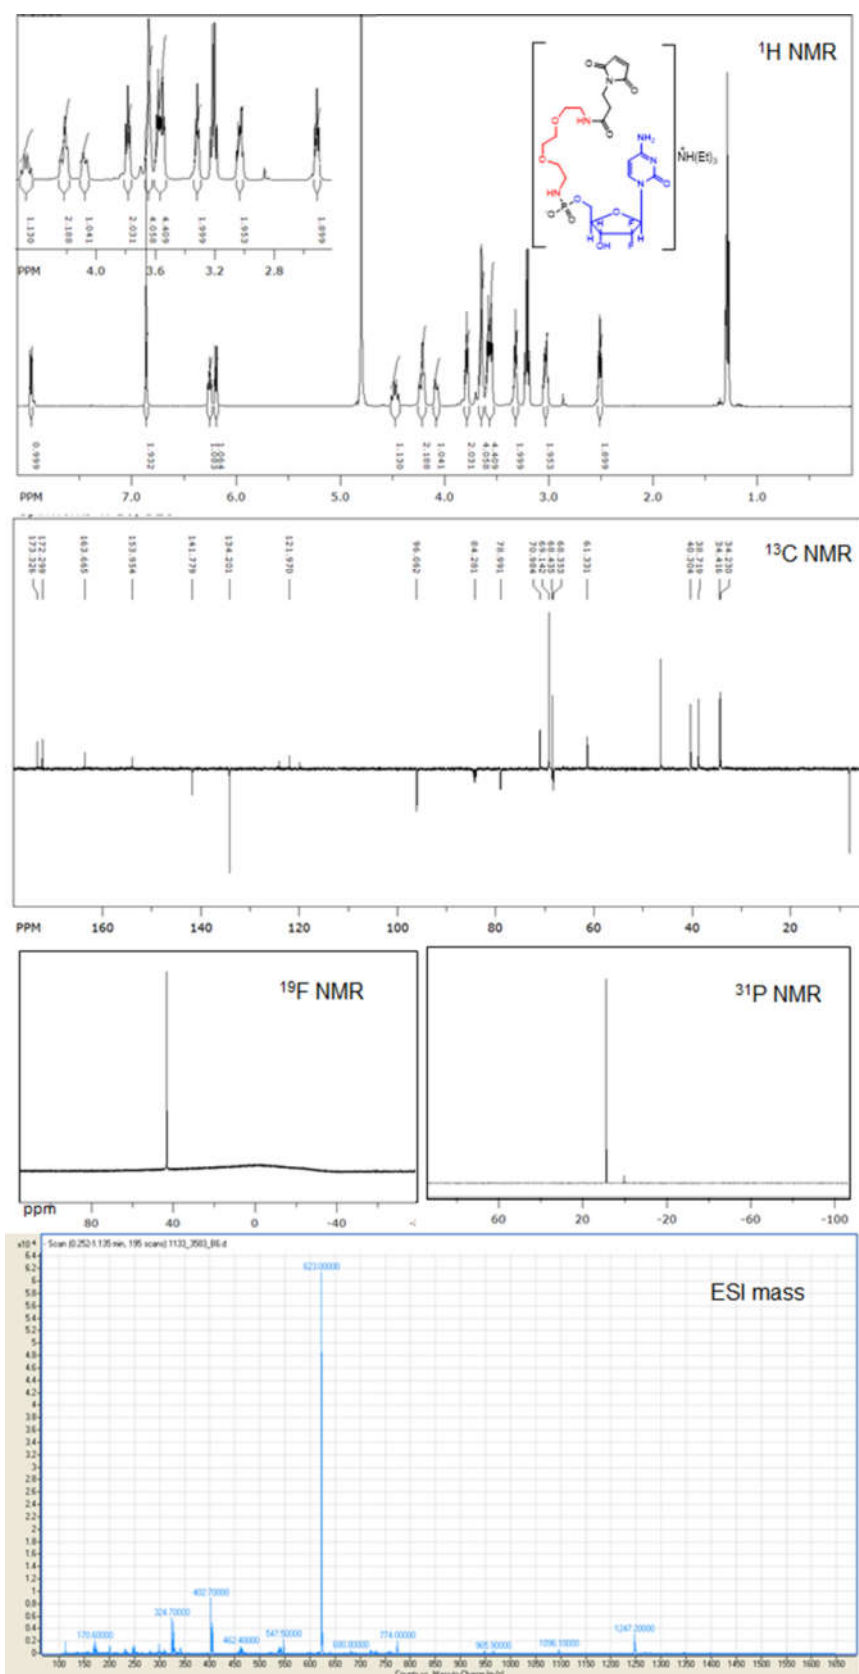

Figure S9. Characteristics of the [Compound 10](TEA).

$^1\text{H}$  NMR ( $\text{D}_2\text{O}$ ): 7.97 (1H, d,  $J$  7.7, H6), 6.86 (2H, s, CH=CH), 6.26 (1H, t,  $J$  7.1, H1'), 6.20 (1H, d,  $J$  7.7, H5), 4.52-4.43 (1H, m, H3'), 4.26-4.18 (2H, m, H5'), 4.11-4.05 (1H, m, H4'), 3.79 (2H, t,  $J$  6.3,  $\text{CH}_2\text{N}$ ), 3.67-3.62 (4H, m,  $\text{CH}_2\text{O}$ ), 3.58 (2H, t,  $J$  5.5,  $\text{OCH}_2\text{CH}_2\text{O}$ ), 3.55 (2H, t,  $J$  5.5,  $\text{OCH}_2\text{CH}_2\text{O}$ ), 3.32 (2H, br t,  $J$  5.3,  $\text{CH}_2\text{NHCO}$ ), 3.05-3.01 (2H, m,  $\text{CH}_2\text{NHP}$ ), 2.51 (2H, t,  $J$  6.4,  $\text{CH}_2\text{CONH}$ ).  $^{13}\text{C}$  NMR ( $\text{D}_2\text{O}$ ): 173.33, 172.30, 163.67, 153.95, 141.78, 134.20, 121.97 (t,  $J_{\text{CF}}$  259), 96.06, 84.28 (t,  $J_{\text{CF}}$  23), 78.99, 70.98, 69.14, 68.44, 68.35 (t,  $J_{\text{CF}}$  23), 61.33, 40.30, 38.72, 34.42, 34.23.  $^{19}\text{F}$  NMR ( $\text{D}_2\text{O}$ ): 43.14 (br s,  $\text{CF}_2$ ).  $^{31}\text{P}$  NMR: 8.67 (s).  $[\text{M}-\text{H}]^-$  calcd. for  $\text{C}_{22}\text{H}_{30}\text{F}_2\text{N}_6\text{O}_{11}\text{P}^-$  623.17; found 623.00.

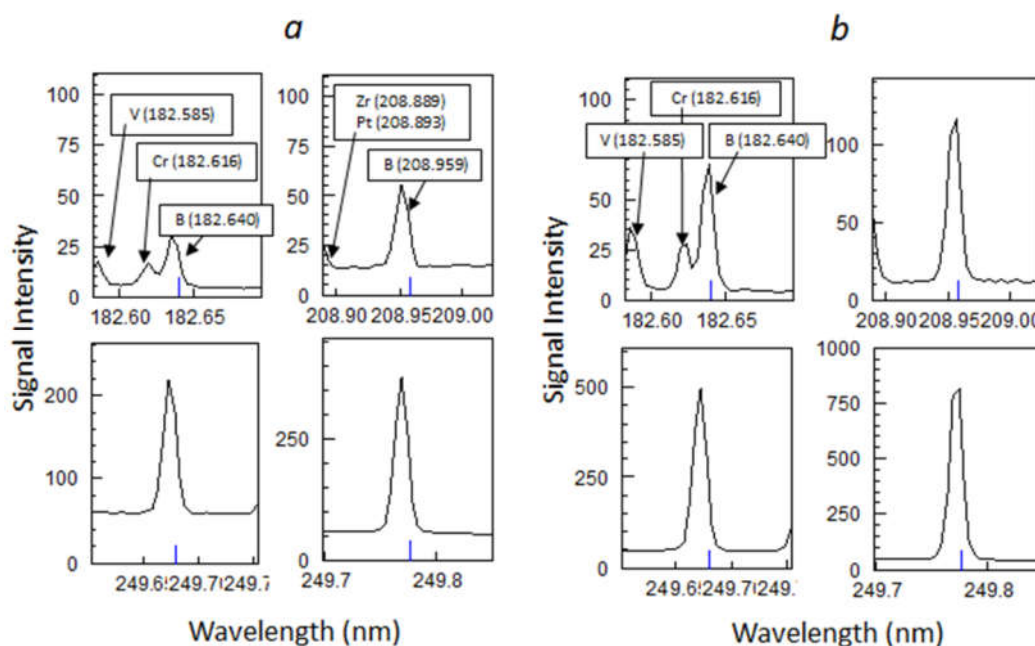

Figure S10. Inductively coupled plasma atomic emission spectrometry (ICP AES) for HSA-Cy5-HcyTFAc-GCB<sub>12</sub>H<sub>11</sub> (a) and HSA-Cy7-HcyTFAc-GCB<sub>12</sub>H<sub>11</sub> (b). Boron spectral lines 182.640, 208.959, 249.678 and 249.773 nm.

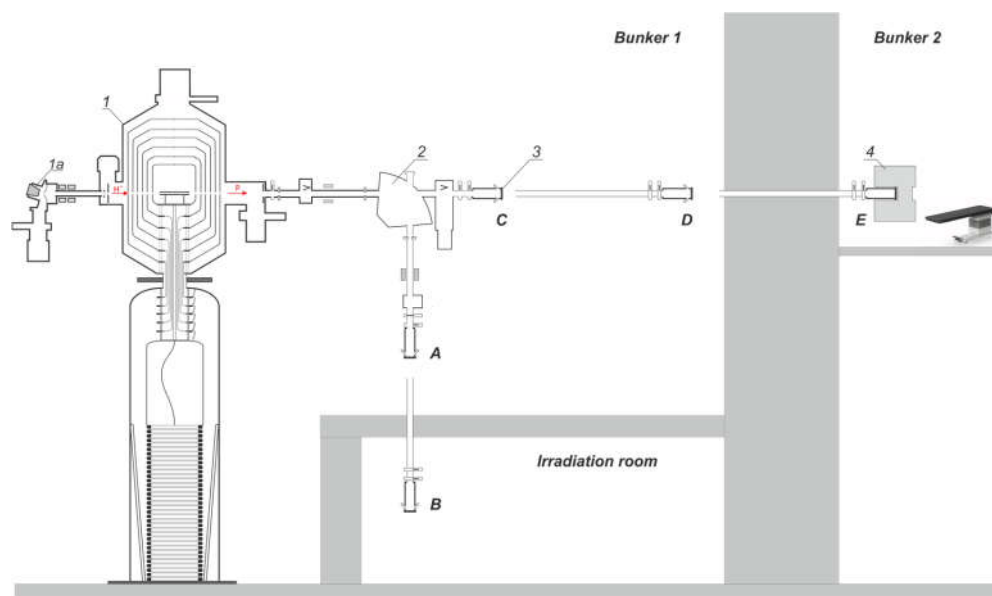

Figure S11. Layout of the experimental facility: 1 – vacuum insulated tandem accelerator, 2 – bending magnet, 3 – lithium target, 4 – beam shaping assembly. A, B, C, D, E – lithium target placement positions.
